# Supplementary material
Source: PubMed Central journal article supplement (PMC1088783)

These are electronic appendices to the paper by Carranza *et al.* 2001 Parallel gigantism and complex colonization patterns in the Cape Verde scincid lizards *Mabuya* and *Macroscincus* (Reptilia: Scincidae) revealed by mitochondrial DNA sequences. *Proc. R. Soc. Lond. B* **268**, 1595—1603. (DOI 10.1098/rspb.2001.1699.)

Electronic appendices are refereed with the text. However, no attempt is made to impose a uniform editorial style on the electronic appendices.

## ELECTRONIC APPENDIX A

*Details of material and sequences used in the present study. Localities are shown in figure 1 of the publication by working numbers of samples (M1, M2, etc...).*

(Note: BMNH– prefixes the accession numbers of voucher specimens deposited in the Natural History Museum, London. DBULPGC- prefixes the accession numbers of voucher specimens deposited in the Department of Biology, University of Gran Canaria, Canary Islands, Spain. COI is an abbreviation of cytochrome oxidase I.

| Species                           | Location on Fig1 | Locality                         | Museum number | GenBank accession numbers<br>12S rRNA / Cytochrome <i>b</i> / COI |
|-----------------------------------|------------------|----------------------------------|---------------|-------------------------------------------------------------------|
| <b>Family Scincidae</b>           |                  |                                  |               |                                                                   |
| <b>Subfamily Scincinae</b>        |                  |                                  |               |                                                                   |
| <i>Scincus mitranus</i>           | ----             | United Arab Emirates             |               | AF280120 / AF280131                                               |
| <b>Subfamily Chalcidinae</b>      |                  |                                  |               |                                                                   |
| <i>Amphiglossus igneocaudatus</i> | ----             | Toliaria, Amboasary, Madagascar  |               | AF280114 / AF280125                                               |
| <i>Pamelascincus gardineri</i>    | ----             | Silhouette, Seychelles           |               | AF280117 / AF280128                                               |
| <i>Androngo trivittatus</i>       | ----             | Toliaria, Amboasary, Madagascar  |               | AF280115 / AF280126                                               |
| <i>Gongylomorphus fontenayi</i>   | ----             | Mare Longue, SW Mauritius        |               | AF280121 / AF280132                                               |
| <b>Subfamily Lygosominae</b>      |                  |                                  |               |                                                                   |
| <i>Cyclodomorphus casuarinae</i>  | ----             | Tasmania                         |               | AF280118 / AF280129                                               |
| <i>Egernia whitii</i>             | ----             | Tasmania                         |               | AF280119 / AF280130                                               |
| <i>Cryptoblepharus boutoni</i>    | ----             | Gabriel Island, Mauritius        |               | AF280116 / AF280127                                               |
| <i>Leiopisma telfairi</i>         | ----             | Round Island, Mauritius          |               | AF280122 / AF280133                                               |
| <b>Genus <i>Macroscincus</i></b>  |                  |                                  |               |                                                                   |
| <b>Cape Verde</b>                 |                  |                                  |               |                                                                   |
| <i>Macroscincus coctei</i>        | M241             | Branco or Razo                   | BMNH91.9.24.1 | AF280182 / AF280314 / AF280248                                    |
| <i>Macroscincus coctei</i>        | M242             | Branco or Razo                   | BMNH91.9.24.2 | AF280181 / AF280313 / AF280247                                    |
| <b>Genus <i>Mabuya</i></b>        |                  |                                  |               |                                                                   |
| <b>Mainland Africa</b>            |                  |                                  |               |                                                                   |
| <i>M. maculabris maculabris</i>   | M70              | Momane Swamp, N. Mozambique      |               | AF280137 / AF280269 / AF280203                                    |
| <i>M. maculabris casuarinae</i>   | M71              | Fogo I., Mozambique              |               | AF280138 / AF280270 / AF280204                                    |
| <i>M. margaritifera</i>           | M69              | Malema, Mozambique               |               | AF280136 / AF280268 / AF280202                                    |
| <i>M. capensis</i>                | M72              | Kouga Mts. E. Cape, South Africa |               | AF280139 / AF280271 / AF280205                                    |
| <b>Seychelles</b>                 |                  |                                  |               |                                                                   |
| <i>M. seychellensis</i>           | M1               | Mahé, Seychelles                 |               | AF280123 / AF280134                                               |
| <i>M. wrightii</i>                | M2               | Fregate Island, Seychelles       |               | AF280124 / AF280135                                               |
| <b>Socotra</b>                    |                  |                                  |               |                                                                   |
| <i>M. socotranus</i>              | M73              | Socotra I. Yemen                 |               | AF280140 / AF280272 / AF280206                                    |
| <i>M. socotranus</i>              | M74              | Socotra I. Yemen                 |               | AF280141 / AF280273 / AF280207                                    |
| <b>Cape Verde</b>                 |                  |                                  |               |                                                                   |
| <i>M. vaillanti</i>               | M23              | Cova Figueira, Fogo              | BMNH200.8     | AF280196 / AF280328 / AF280262                                    |
| <i>M. vaillanti</i>               | M48              | Atalaia, Fogo                    | DBULPGC-100   | AF280197 / AF280329 / AF280263                                    |

|                                  |     |                                |              |                                |
|----------------------------------|-----|--------------------------------|--------------|--------------------------------|
| <i>M. vaillanti</i>              | M49 | Feijoal, Fogo                  | BMNH2000.9   | AF280198 / AF280330 / AF280264 |
| <i>M. vaillanti</i>              | M51 | Santa Cruz, Santiago           | DBULPGC-1001 | AF280200 / AF280332 / AF280266 |
| <i>M. vaillanti</i>              | M50 | Santa Cruz, Santiago           | BMNH2000.10  | AF280199 / AF280331 / AF280265 |
| <i>M. vaillanti</i>              | M52 | Santa Cruz, Santiago           | BMNH2000.11  | AF280201 / AF280333 / AF280267 |
| <i>M. delalandii</i>             | M67 | Serra Malagueta, Santiago      | BMNH2000.12  | AF280188 / AF280320 / AF280254 |
| <i>M. delalandii</i>             | M20 | Chao Bom, Santiago             | DBULPGC-102  | AF280186 / AF280318 / AF280252 |
| <i>M. delalandii</i>             | M47 | Tarrafal, Santiago             | BMNH2000.13  | AF280187 / AF280319 / AF280253 |
| <i>M. delalandii</i>             | M68 | Picos, Santiago                | BMNH2000.14  | AF280189 / AF280321 / AF280255 |
| <i>M. delalandii</i>             | M40 | Ilheu Grande, Rombos           | DBULPGC-103  | AF280192 / AF280324 / AF280258 |
| <i>M. delalandii</i>             | M21 | Ilheu Grande, Rombos           | BMNH2000.15  | AF280190 / AF280322 / AF280256 |
| <i>M. delalandii</i>             | M39 | Ilheu Grande, Rombos           | BMNH2000.16  | AF280191 / AF280323 / AF280257 |
| <i>M. delalandii</i>             | M19 | Mosteiros, Fogo                | BMNH2000.17  | AF280183 / AF280315 / AF280249 |
| <i>M. delalandii</i>             | M38 | Mosteiros, Fogo                | DBULPGC-104  | AF280184 / AF280316 / AF280250 |
| <i>M. delalandii</i>             | M45 | Chã das caldeiras, Fogo        | BMNH2000.18  | AF280185 / AF280317 / AF280251 |
| <i>M. delalandii</i>             | M41 | Furna, Brava                   | BMNH2000.19  | AF280194 / AF280326 / AF280260 |
| <i>M. delalandii</i>             | M22 | Cachaço, Brava                 | DBULPGC-105  | AF280193 / AF280325 / AF280259 |
| <i>M. delalandii</i>             | M42 | Cachaço, Brava                 | BMNH2000.20  | AF280195 / AF280327 / AF280261 |
| <i>M. fogoensis nicolauensis</i> | M34 | Cachaço, Saõ Nicolau           | BMNH2000.21  | AF280173 / AF280305 / AF280239 |
| <i>M. fogoensis nicolauensis</i> | M17 | Faro de Barril, Saõ Nicolau    | DBULPGC-106  | AF280172 / AF280304 / AF280238 |
| <i>M. fogoensis nicolauensis</i> | M35 | Faro de Barril, Saõ Nicolau    | BMNH2000.22  | AF280174 / AF280306 / AF280240 |
| <i>M. fogoensis antaoensis</i>   | M63 | Ribeira da Cruz, Santo Antão   | BMNH2000.23  | AF280179 / AF280311 / AF280245 |
| <i>M. fogoensis antaoensis</i>   | M58 | Chã de Lagoa, Santo Antão      | DBULPGC-107  | AF280175 / AF280307 / AF280241 |
| <i>M. fogoensis antaoensis</i>   | M59 | Chã de Lagoa, Santo Antão      | BMNH2000.24  | AF280176 / AF280308 / AF280242 |
| <i>M. fogoensis antaoensis</i>   | M62 | Ponta do Brejo, Santo Antão    | DBULPGC-108  | AF280178 / AF280310 / AF280244 |
| <i>M. fogoensis antaoensis</i>   | M60 | Chã de Lagoa, Santo Antão      | BMNH2000.25  | AF280177 / AF280309 / AF280243 |
| <i>M. fogoensis antaoensis</i>   | M64 | Dogoi, Santo Antão             | BMNH2000.26  | AF280180 / AF280312 / AF280246 |
| <i>M. stangeri</i>               | M18 | Calhau, São Vicente            | BMNH2000.27  | AF280169 / AF280301 / AF280235 |
| <i>M. stangeri</i>               | M44 | Calhau, São Vicente            | DBULPGC-109  | AF280167 / AF280299 / AF280233 |
| <i>M. stangeri</i>               | M16 | Calhau, São Vicente            | BMNH2000.28  | AF280168 / AF280300 / AF280234 |
| <i>M. stangeri</i>               | M65 | Branco                         | DBULPGC-110  | AF280170 / AF280302 / AF280236 |
| <i>M. stangeri</i>               | M66 | Branco                         | BMNH2000.29  | AF280171 / AF280303 / AF280237 |
| <i>M. stangeri</i>               | M15 | Santa Luzia                    | DBULPGC-111  | AF280165 / AF280297 / AF280231 |
| <i>M. stangeri</i>               | M33 | Santa Luzia                    | BMNH2000.30  | AF280166 / AF280298 / AF280232 |
| <i>M. stangeri</i>               | M32 | Razo                           | DBULPGC-112  | AF280164 / AF280296 / AF280230 |
| <i>M. stangeri</i>               | M13 | Razo                           | BMNH2000.31  | AF280162 / AF280294 / AF280228 |
| <i>M. stangeri</i>               | M31 | Razo                           | BMNH2000.32  | AF280163 / AF280295 / AF280229 |
| <i>M. spinalis maioensis</i>     | M54 | Praia Preta, Maio              | BMNH2000.33  | AF280160 / AF280292 / AF280226 |
| <i>M. spinalis maioensis</i>     | M53 | Morrinho, Maio                 | DBULPGC-113  | AF280159 / AF280291 / AF280225 |
| <i>M. spinalis maioensis</i>     | M55 | Santo Antonio, Maio            | BMNH2000.34  | AF280161 / AF280293 / AF280227 |
| <i>M. spinalis spinalis</i>      | M28 | Chão Bom, Santiago             | BMNH2000.35  | AF280147 / AF280279 / AF280213 |
| <i>M. spinalis spinalis</i>      | M11 | Chão Bom, Santiago             | DBULPGC-114  | AF280146 / AF280278 / AF280212 |
| <i>M. spinalis spinalis</i>      | M43 | Tarrafal, Santiago             | BMNH2000.36  | AF280148 / AF280280 / AF280214 |
| <i>M. spinalis spinalis</i>      | M29 | Ilheu de Santa Maria, Santiago | BMNH2000.37  | AF280149 / AF280281 / AF280215 |
| <i>M. spinalis spinalis</i>      | M30 | Ilheu de Santa Maria, Santiago | DBULPGC-115  | AF280150 / AF280282 / AF280216 |
| <i>M. spinalis spinalis</i>      | M12 | Ilheu de Santa Maria, Santiago | BMNH2000.38  | AF280151 / AF280283 / AF280217 |
| <i>M. spinalis spinalis</i>      | M76 | Lomba, Fogo                    | BMNH2000.39  | AF280157 / AF280289 / AF280223 |
| <i>M. spinalis spinalis</i>      | M77 | Lomba, Fogo                    | BMNH2000.40  | AF280158 / AF280290 / AF280224 |
| <i>M. spinalis spinalis</i>      | M37 | 7 Km N of Achada Furna, Fogo   | DBULPGC-116  | AF280155 / AF280287 / AF280221 |
| <i>M. spinalis spinalis</i>      | M36 | 7 Km N of Achada Furna, Fogo   | BMNH2000.41  | AF280154 / AF280286 / AF280220 |
| <i>M. spinalis spinalis</i>      | M14 | 7 Km N of Achada Furna, Fogo   | BMNH2000.42  | AF280156 / AF280288 / AF280222 |
| <i>M. spinalis salensis</i>      | M9  | Buracona, Sal                  | DBULPGC-117  | AF280152 / AF280284 / AF280218 |
| <i>M. spinalis salensis</i>      | M25 | Pedra Lume, Sal                | BMNH2000.43  | AF280153 / AF280285 / AF280219 |
| <i>M. spinalis salensis</i>      | M26 | Sal Rei, Boavista              | BMNH2000.44  | AF280143 / AF280275 / AF280209 |
| <i>M. spinalis salensis</i>      | M27 | Curral Velho, Boavista         | BMNH2000.45  | AF280144 / AF280276 / AF280210 |
| <i>M. spinalis salensis</i>      | M10 | Ilheu de Sal Rei, Boavista     | DBULPGC-118  | AF280142 / AF280274 / AF280208 |
| <i>M. spinalis salensis</i>      | M57 | Ilheu Curral Velho, Boavista   | BMNH2000.46  | AF280145 / AF280277 / AF280211 |

## ELECTRONIC APPENDIX B

Observed number of transitions (Ts) and transversions (Tv) plotted against uncorrected distances for the 12S rRNA, cytochrome *b* and cytochrome oxidase I genes and the two data sets of the trees of figure 2 (data set 1) and figure 3 (data set 2). A, 12S rRNA Ts and Tv for data set 1; B, cytochrome *b* third codon Ts for data set 1; C, cytochrome *b* third codon Tv for data set 1; D, 12S rRNA Ts and Tv for data set 2; E, cytochrome *b* third codon Ts for data set 2; F, cytochrome *b* third codon Tv for data set 2; G, cytochrome oxidase I third codon Ts for data set 2; H, cytochrome oxidase I third codon Tv for data set 2. The ringed Ts marked with an “a” are those involved in the comparisons between the Cape Verde skinks and the rest of the scincids analyzed in figure 2; marked with a “b” and a “c” are those involved in the comparisons within the Cape Verde skinks.

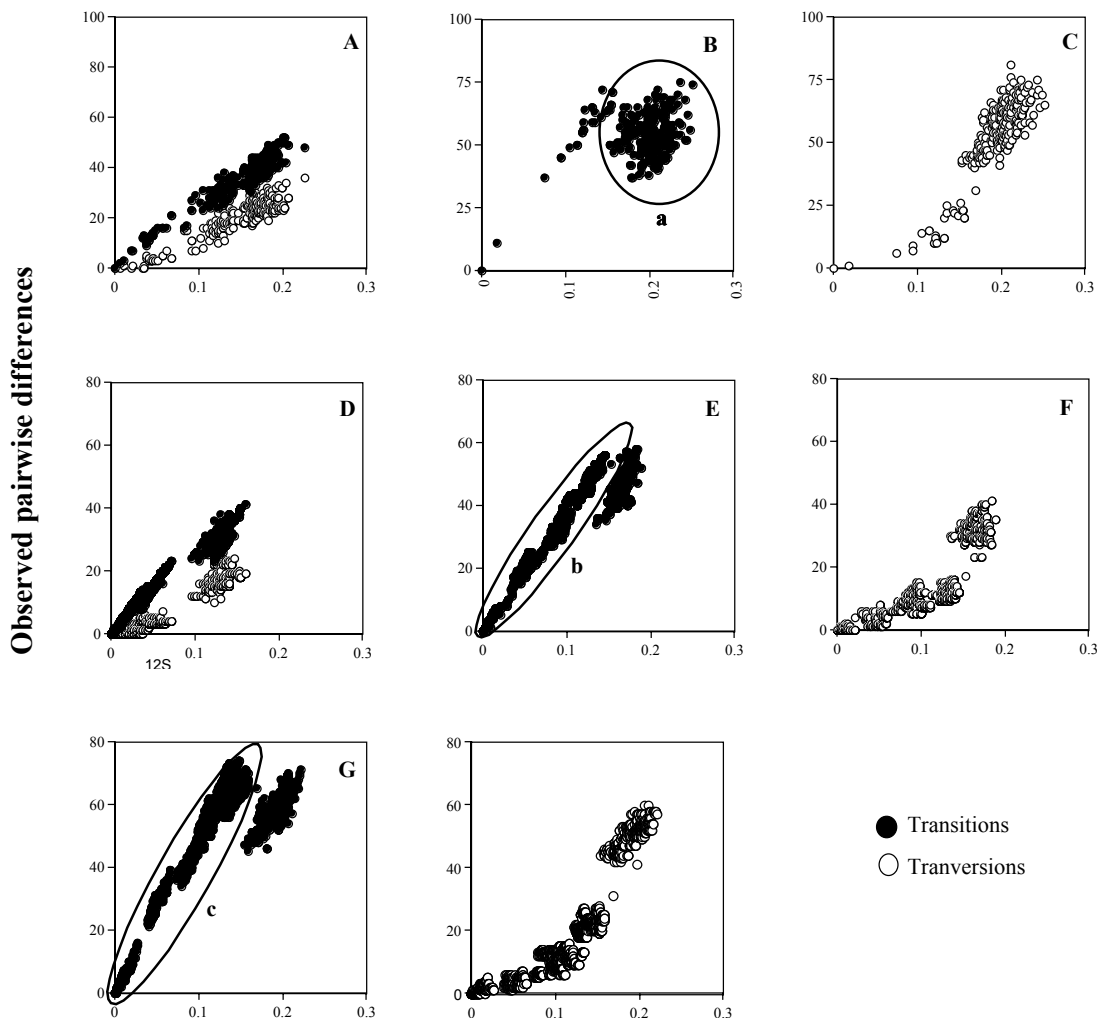

Supplement: PB011595s01.pdf [file PB011595s01.pdf]
